# Supplementary material for: Performance-based functional impairment and readmission and death: a prospective study
Source: PubMed Central journal article supplement — BMJ Open. 2017 Jun 8;7(6):e016207. doi: 10.1136/bmjopen-2017-016207 (PMC5726050; doi:10.1136/bmjopen-2017-016207), 2017-06-08
Supplement: bmjopen-2017-016207.draft_revisions.pdf [file bmjopen-2017-016207.draft_revisions.pdf]

# BMJ Open

## Performance-based functional impairment and readmission and death: a prospective study

|                                 |                                                                                                                                                                                                                                                                                                                                                                                                                                                                                                                                            |
|---------------------------------|--------------------------------------------------------------------------------------------------------------------------------------------------------------------------------------------------------------------------------------------------------------------------------------------------------------------------------------------------------------------------------------------------------------------------------------------------------------------------------------------------------------------------------------------|
| Journal:                        | <i>BMJ Open</i>                                                                                                                                                                                                                                                                                                                                                                                                                                                                                                                            |
| Manuscript ID                   | bmjopen-2017-016207                                                                                                                                                                                                                                                                                                                                                                                                                                                                                                                        |
| Article Type:                   | Research                                                                                                                                                                                                                                                                                                                                                                                                                                                                                                                                   |
| Date Submitted by the Author:   | 31-Jan-2017                                                                                                                                                                                                                                                                                                                                                                                                                                                                                                                                |
| Complete List of Authors:       | Aubert, Carole; Inselspital, Bern University Hospital, University of Bern, General Internal Medicine<br>Folly, Antoine; HFR Fribourg Hopital cantonal, General Internal Medicine<br>Mancinetti, Marco; HFR Fribourg Hopital cantonal, General Internal Medicine<br>Hayoz, Daniel; HFR Fribourg Hopital cantonal, General Internal Medicine<br>Donzé, Jacques; Inselspital, Bern University Hospital, University of Bern, General Internal Medicine; Brigham and Women's Hospital Department of Medicine, General Medicine and Primary Care |
| <b>Primary Subject Heading</b>: | General practice / Family practice                                                                                                                                                                                                                                                                                                                                                                                                                                                                                                         |
| Secondary Subject Heading:      | Epidemiology, Geriatric medicine, Public health, Rehabilitation medicine                                                                                                                                                                                                                                                                                                                                                                                                                                                                   |
| Keywords:                       | readmission, death, functional status, Timed Up and Go                                                                                                                                                                                                                                                                                                                                                                                                                                                                                     |
|                                 |                                                                                                                                                                                                                                                                                                                                                                                                                                                                                                                                            |

SCHOLARONE™  
Manuscripts

Only

**Performance-based functional impairment and readmission and death: a prospective study****Running head:** Functional status, readmission and death**Authors:** Carole E Aubert, MD<sup>1,2</sup>, Antoine Folly<sup>2</sup>, Mancinetti Marco, MD<sup>2</sup>, Daniel Hayoz, MD<sup>2</sup>, Jacques D Donzé, MD, MSc<sup>1,3,4</sup>.**Authors affiliations:** <sup>1</sup> Department of General Internal Medicine, Inselspital, Bern University Hospital, University of Bern, Bern, Switzerland. <sup>2</sup> Department of General Internal Medicine, Fribourg Cantonal Hospital, Fribourg, Switzerland. <sup>3</sup> Division of General Medicine and Primary Care, Brigham and Women's Hospital, Boston, Massachusetts, USA. <sup>4</sup> Harvard Medical School, Boston, Massachusetts, USA.**Corresponding author:**

Carole E Aubert, MD, Department of General Internal Medicine, Inselspital, Bern University Hospital, Freiburgstrasse, 3010 Bern, Switzerland.

Email: caroleelodie.aubert@insel.ch; phone: +41 31 632 21 11; fax: +41 31 632 88 85.

**Authors contribution:** All authors had access to the data during the study. Dr Aubert takes responsibility for the integrity of the data and the accuracy of the data analysis and is the guarantor. *Study concept and design:* Aubert, Donzé, Hayoz, Mancinetti. *Acquisition of data:* Aubert, Folly, Mancinetti. *Analysis and interpretation of data:* Aubert, Donzé. *Drafting of the manuscript:* Aubert, Donzé. *Critical revision of the manuscript for important intellectual content:* Hayoz, Folly, Mancinetti.**Funding source:** This research received no specific grant from any funding agency in the public, commercial or not-for-profit sectors.**Conflict of interest and acknowledgment:** Nothing to declare.**Word count:** 2434.**Abstract word count:** 247.**Key words:** readmission, death, functional status, Timed Up and Go.**Category:** Original Article.

## ABSTRACT

### Objectives

Readmission and death are frequent after a hospitalization and difficult to predict. While many risk factors have been identified, only few studies have focused on functional status. We assessed whether functional impairment at discharge is associated with readmission and death after an acute medical hospitalization.

### Design, setting and participants

We prospectively included patients aged  $\geq 50$  years admitted to the Department of General Internal Medicine of a large community hospital. Functional status was assessed shortly before discharge using the Timed Up and Go test performed twice in a standard way by trained physiotherapists, and defined functional impairment as a test duration  $\geq 15$  seconds.

### Primary and secondary outcome measures

The primary and secondary outcome measures were unplanned readmission and death, respectively, within 6 months after discharge.

### Results

Within 6 months after discharge, 107/338 (31.7%) patients had an unplanned readmission and 31/338 (9.2%) died. Functional impairment was associated with higher risk of death (OR 2.44, 95% CI 1.15-5.18), but not with unplanned readmission (OR 1.34, 95% CI 0.84-2.15). No significant association was found between functional impairment and the total number of unplanned rehospitalizations (adjusted OR 1.59, 95%CI 0.95-2.67). The most frequent causes of readmission were cardiovascular, oncological, and infectious diseases, and were similar regardless of the functional status.

### Conclusions

Functional impairment at discharge of an acute medical hospitalization was associated with higher risk of death, but not of unplanned readmission within 6 months after discharge. Simple performance-based assessment may represent a better prognostic measure for mortality than for readmission.

## ARTICLE SUMMARY

### Strengths and limitations of this study

- ❖ Largest prospective cohort study evaluating the association of performance-based assessment with readmissions and death
- ❖ Long follow-up time of 6 months without loss to follow-up
- ❖ Assessment of both readmissions and deaths, separately
- ❖ Single center study including only medical patients

**DATA SHARING STATEMENT:** There are no unpublished data from the study.

## INTRODUCTION

1  
2  
3  
4 After an acute care hospitalization, readmissions are frequent, affecting 14-22% of the patients  
5 within 30 days after hospital discharge, and are associated with significant costs as well for the  
6 patients themselves as for the healthcare systems.<sup>1-3</sup> Factors that contribute to readmission are  
7 manifolds, including multimorbidity, complication of medical treatment, length of hospital stay,  
8 number of previous hospitalizations, socio-economic factors, care coordination, monitoring,  
9 follow-up care, and/or home support.<sup>1,4,5</sup> In this complex equation, patient's functional impairment  
10 could intuitively be considered as a potential risk factor for readmission. However, only few  
11 studies assessed the association between functional impairment and readmission.<sup>6-15</sup> Although  
12 those studies reported mainly a significant association between functional impairment and  
13 readmission,<sup>7-15</sup> they were often limited by a retrospective design,<sup>7-10,12,15</sup> and by the use of self-  
14 reported functional assessment, such as Activities of Daily Life (ADL) or Instrumental ADL  
15 (IADL).<sup>7,8,10,11,13-15</sup>

16  
17 Performance-based functional methods have been shown to perform better than self-reported  
18 assessment.<sup>16</sup> One of the former is the Timed Up and Go (TUG) test, a brief, objective and simple  
19 performance-based assessment of functional status that doesn't require any special competence or  
20 equipment, allowing a wide use in everyday practice.<sup>17</sup> This test has been particularly associated  
21 with the risk of falls,<sup>18-22</sup> and is included in clinical guidelines to assess balance, gait, mobility,  
22 and risk of falls.<sup>23-25</sup>

23  
24 In summary, the association between functional impairment and readmission is lacking high-level  
25 evidence such as prospective studies, using reliable performance-based assessment of functional  
26 status. Evidence on its association with mortality after discharge is even scarcer and more  
27 controversia.<sup>26,27</sup> Our aim was therefore to assess the association of performance-based functional  
28 impairment at discharge of an acute medical hospitalization with unplanned readmission and death  
29 in a prospective cohort study.

## MATERIALS AND METHODS

Reporting is in accordance with the *STrengthening the Reporting of OBservational studies in Epidemiology (STROBE)* statement.<sup>28</sup>

### Study design and population

In a prospective cohort study, we included all consecutive patients aged  $\geq 50$  years admitted to the Department of General Internal Medicine of a large secondary care hospital in Switzerland (Fribourg Cantonal Hospital), between April and September 2013. Our exclusion criteria were: 1) discharge the day of admission; 2) discharge to another acute care clinic, a rehabilitation setting, a palliative care clinic or another division of the same hospital; 3) death during the index hospitalization; 4) refusal or inability to give informed consent. The study complies with the Declaration of Helsinki and local ethics committee approved the study. For this observational cohort without intervention, we didn't perform a sample size calculation, and limited the sample size due to the resources available.

### Outcomes

We defined our primary outcome as the first unplanned readmission to any division of any acute care hospital, and our secondary outcome as death, both within 6 months after discharge of index hospitalization. We defined planned readmission as scheduled hospitalization for investigation (e.g. elective bronchoscopy) or for not emergent treatment (e.g. planned radiotherapy for oncological treatment). All patients were contacted by phone call 6 months after discharge, in order to record our outcomes. If we failed to reach the patient directly, we phoned the general practitioner, a next of kin, or the nursing home, depending on each situation. To increase reliability, we additionally checked in the electronic health record for any readmission or death recorded within the network of Fribourg hospitals, which includes the 3 acute care hospitals of the

1 same region (Fribourg, Riaz, and Tavel), and four rehabilitation centers (Billens, Murten, Riaz,  
2 Tavel).

3  
4 Causes of unplanned readmission and death were retrieved from medical records and classified  
5 into 10 categories, according to the system affected: 1) osteoarticular disease; 2) gastrointestinal  
6 disease; 3) infection; 4) neuropsychiatric disease (including dementia, alcohol disorder and  
7 intoxication); 5) respiratory disease; 6) oncological disease; 7) endocrine or metabolic disease; 8)  
8 renal disease; 9) cardiovascular disease; 10) other.  
9  
10  
11  
12  
13  
14  
15  
16

### 17 **Functional status assessment**

18  
19 Patients performed the TUG test before discharge, according to its original description.<sup>17</sup> They  
20 were instructed to stand up from a chair without using their arms, walk 3 meters ahead (distance  
21 was marked on the floor), turn around, walk back to the chair and sit down. The duration to  
22 complete the test was timed by a stopwatch and recorded in seconds, beginning on the command  
23 “go” given to the patient, and ending after he/she had sit down and leaned against the back of the  
24 chair. The test was performed twice and the shortest time, indicating the best performance, was  
25 used for the analyses. Patients were allowed to use routine walking aids if needed (e.g. crutches or  
26 walker), but did not receive any physical assistance. Only three different trained physiotherapists  
27 performed the TUG test to all the cohort population. As we found no agreement in the literature  
28 for a specific duration to sort out patients with functional impairment,<sup>18</sup> we used the receiver  
29 operating characteristic (ROC) curve to define the optimal cutoff level associated with our  
30 outcomes. For this purpose, we used the point closest to the top left corner of the ROC curve,  
31 because it represents the best compromise between sensitivity and specificity.<sup>29</sup> Functional  
32 impairment was defined as a TUG test duration longer than the cutoff level that we identified. The  
33 areas under the ROC curves were 0.57 (95% confidence interval [CI] 0.51-0.64) for 6-months  
34 unplanned readmission and 0.63 (95% CI 0.54-0.73) for 6-months death. Both ROC curves  
35 identified the optimal cutoff level at 15 seconds. At this cutoff level, the sensitivity was 39.2% and  
36 58.1% for unplanned readmission and death, respectively, and the specificity 66.1% and 64.1%.

## Covariates

Socio-demographic data, number of hospitalizations during the 6 months before index admission and clinical information were recorded at baseline. Comorbidity was assessed by the Charlson comorbidity index, which attributes points a number of 1,2,3 or 6 to different medical conditions, depending on their severity,<sup>30</sup> and multimorbidity was defined as the presence of at least 2 chronic diseases according to this index. The main diagnoses of index admission were retrieved from medical records and divided into the same 10 categories as for diagnoses of readmission and death.

## Data analysis

We presented continuous variables as median with interquartile range (IQR) because of their non-normal distribution, and compared them using nonparametric K-sample test on the equality of medians. Categorical variables were presented as frequency and percentage and compared using Pearson's chi-squared test.

Univariate logistic regression analysis was used to assess the association between functional impairment and unplanned readmission and death, respectively, within 6 months after hospital discharge. Multivariate analysis was adjusted for age and gender. We performed two sensitivity analyses including eight patients with missing data for the TUG test. We defined the duration of their non-performed TUG test as  $\geq 15$  seconds in the first one (i.e. functional impairment), and as  $< 15$  seconds in the second one (i.e. no functional impairment).

A two sided  $P < .05$  was considered to indicate statistical significance. All analyses were performed using STATA release 13.0 (StataCorp LP, College Station, Texas).



## RESULTS

We included 338 patients (Figure 1) and had no lost to follow-up. Median age was 73 (IQR 65-83) years with 168 (49.7%) men. Median Charlson comorbidity index was 5 (IQR 7-9) and 302 (89.4%) of the patients had multimorbidity. Median length of stay for index hospitalization was 7 (IQR 4-12) days. Within 6 months after discharge, 107 (31.7%) patients had an unplanned readmission and 31 (9.2%) died. Among the 31 patients who died, 23 (74.2%) had been previously readmitted. Table 1 shows the baseline characteristics of the patients according to functional impairment. Patients with functional impairment were older and more likely to be women and to have been admitted to hospital within the 6 months before index admission ( $P < 0.003$  for all). They had also a higher comorbidity index and a longer length of stay ( $P < 0.001$  for all).

### **Association of functional impairment with unplanned readmission and death**

The median duration of the TUG test was 13.1 (IQR 10.0-19.1) seconds for patients with an unplanned readmission, and 11.8 (IQR 8.1-17.7) seconds for those without any unplanned readmission ( $P = 0.34$ ). The TUG test duration was significantly longer among patients who died (median [IQR] duration: 17 [11-21] versus 12 [8-18] seconds,  $P = 0.04$ ). The duration of the TUG test was  $\geq 15$  seconds in 46 (43.0%) of the 107 patients with an unplanned readmission and in 18 (58.1%) of the patients who died within 6 months after hospital discharge. Functional impairment was associated with a higher risk of death within 6 months after discharge (odds ratio [OR] 2.44, 95% CI 1.15-5.18), while the risk of unplanned readmission was not significantly increased (OR 1.34, 95% CI 0.84-2.15). After adjusting for age and gender, the association was even stronger for death (OR 3.55, 95%CI 1.52-8.25), but remained unchanged for unplanned readmission (OR 1.58, 95%CI 0.94-2.64). We found no significant association between functional impairment and the absolute total number of unplanned rehospitalizations within 6 months (unadjusted OR 1.34, 95%CI 0.84-2.15, adjusted OR 1.59, 95%CI 0.95-2.67). In both sensitivity analyses including the

1  
2  
3  
4  
5  
6  
7  
8  
9  
10  
11  
12  
13  
14  
15  
16  
17  
18  
19  
20  
21  
22  
23  
24  
25  
26  
27  
28  
29  
30  
31  
32  
33  
34  
35  
36  
37  
38  
39  
40  
41  
42  
43  
44  
45  
46  
47  
48  
49  
50  
51  
52  
53  
54  
55  
56  
57  
58  
59  
60

8 patients with missing data for the TUG test, results remained similar, with a significant increased risk of death, but not of readmission: sensitivity analysis defining patients with missing data as functional impaired (TUG test duration  $\geq 15$  seconds): adjusted OR 3.57, 95% 1.57-8.08 for death, adjusted OR 1.77, 95% CI 1.07-2.92. Sensitivity analysis defining patients with missing data as non-functional impaired (TUG test duration  $< 15$  seconds): adjusted OR 2.93, 95%CI 1.31-6.56 for death, adjusted OR 1.43, 95%CI 0.86-2.37 for readmission.

### **Primary causes of admission, unplanned readmission and death**

Cardiovascular, infectious and neuropsychiatric diseases were the 3 most frequent main diagnoses of index hospitalizations, with 91 (27%), 67 (20%), and 65 (19%) cases, respectively.

The causes of unplanned readmissions are described in table 2, according to the duration of the TUG test. Cardiovascular, oncological and diseases accounted for 56 (52.3%) of all unplanned readmissions. Overall, we found more readmissions due to oncological, osteoarticular or gastrointestinal diseases among patients without, in comparison to those with functional impairment. Conversely, readmissions due to infection were more prevalent in patients with a TUG test duration  $\geq 15$  seconds than in those with a TUG test duration  $< 15$  seconds. The main cause of death was related to an oncological disease (n=17, 54.8%), followed by infectious (n=4, 12.9%) and respiratory diseases (n=3, 9.7%). Death due to oncological disease was more frequent among patients without functional impairment (61.5 vs 50.0%), and death due to infection among those with functional impairment (22.2 vs 7.7%).

## CONCLUSIONS

1  
2  
3  
4 In this prospective cohort study, we found that functional impairment measured by the validated  
5 performance-based method “Timed Up and Go test” before acute care hospital discharge, was  
6 associated with an almost 150% increase in the risk of death within 6 months after hospital  
7 discharge. Conversely, functional impairment was not associated with an increased risk of  
8 unplanned readmission.  
9

10  
11 These findings contrast with previous studies in which functional impairment was mostly  
12 positively associated with a higher risk of readmission.<sup>7-15</sup> Several reasons may explain this  
13 difference. First, unlike most previous studies, we used a performance-based assessment of  
14 functional status (TUG test) as opposed to a self-reported assessment. The TUG test has been  
15 largely validated as a simple, quick, and reliable clinical method to assess functional status.<sup>17,22,31-</sup>

16  
17  
18  
19  
20  
21  
22  
23  
24  
25  
26  
27  
28  
29  
30  
31  
32  
33  
34  
35  
36  
37  
38  
39  
40  
41  
42  
43  
44  
45  
46  
47  
48  
49  
50  
51  
52  
53  
54  
55  
56  
57  
58  
59  
60  
<sup>34</sup> Unlike self-reported evaluations often used in previous studies,<sup>7,8,10,11,13-15</sup> it is objective and its  
very high inter-rater and test-retest reliability allows better comparability.<sup>17,22,35</sup> Although this  
measure is very simple, it is actually constituted of several complex sequences (e.g. moving from  
the sitting to the standing position), each of which evaluating multiple aspects needed for adequate  
functional status, including balance, mobility and coordination.<sup>36</sup> Moreover, as opposed to other  
tools used to assess performance status,<sup>37-39</sup> the TUG test does not suffer from ceiling or floor  
effects in healthy older adults.<sup>40</sup> Owing in part to its sensitivity, this test is recommended by the  
American Geriatrics Society, the British Geriatrics Society, and the Society of Nordic  
Geriatricians to assess balance, gait, functional ability necessary to perform ADL and risk of  
falls.<sup>23-25,41</sup> Second, we included only patients discharged directly home or to a nursing home,  
while others focused on patients discharged to or from a rehabilitation care facility.<sup>7,9,10,15</sup> Patients  
discharged to a rehabilitation clinic may be more functionally impaired than other patients at  
discharge from the acute care settings, may have a higher morbidity level, and may of course have  
their risk influenced by the rehabilitation. Third, we focused on medical patients, while others  
included any types of patients.<sup>7,8,10,11,15</sup> Fourth and finally, we included only unplanned

1 readmissions, while many previous studies included elective readmissions in the primary  
2 outcome.<sup>8,10-12</sup>  
3

4 Two other findings in our study support the absence of association between functional impairment  
5 and readmission. First, the number of hospitalizations in the 6 months following discharge was not  
6 significantly higher in the group of patients with functional impairment. Second, the causes of  
7 readmissions didn't vary according to functional status. Indeed, one may expect to see differences  
8 in the causes of readmission in case of an association between functional status and readmission.  
9  
10 To our knowledge, previous studies recorded diagnoses of admission, but did not assess diagnoses  
11 of readmission or death according to functional status.  
12  
13

14 Interestingly, we found a significant association between functional impairment and death within 6  
15 months after hospital discharge. Only few studies looked at this relationship between functional  
16 impairment and mortality. One, which included 269 geriatric patients, was negative,<sup>14</sup> while a  
17 most recent study found a significant association between higher frailty and death.<sup>27</sup> Larger studies  
18 are needed on this topic to confirm an association and to evaluate if interventions on functional  
19 status, e.g. home care or introduction of walking aids, could improve patients' outcome. All these  
20 findings together support that functional impairment may rather be a prognostic factor for  
21 mortality than a risk factor for readmissions.  
22  
23  
24  
25  
26  
27  
28  
29  
30  
31  
32  
33  
34  
35

36 Our findings should be considered in light of some limitations. First, our sample was relatively  
37 small. However, it is a prospective study, and, to our knowledge, the largest using this design and  
38 a performance-based assessment. Second, the study was conducted in a single center and included  
39 only medical patients, limiting the generalizability of our results; however, except for age, our  
40 population was otherwise unselected. Our study has some strengths. First, we studied both  
41 readmissions and deaths, separately. Second, we had a long follow-up time of 6 months and had  
42 no loss to follow-up during this whole period. Third, we included only unplanned readmissions.  
43  
44 Fourth, we had no lost to follow-up, very few missing data, and in the sensitivity analyses  
45 including patients with missing data, results remained unchanged.  
46  
47  
48  
49  
50  
51  
52  
53  
54  
55  
56  
57  
58  
59  
60

1  
2  
3  
4  
5  
6  
7  
8  
9  
10  
11  
12  
13  
14  
15  
16  
17  
18  
19  
20  
21  
22  
23  
24  
25  
26  
27  
28  
29  
30  
31  
32  
33  
34  
35  
36  
37  
38  
39  
40  
41  
42  
43  
44  
45  
46  
47  
48  
49  
50  
51  
52  
53  
54  
55  
56  
57  
58  
59  
60

In conclusion, in this prospective cohort study, functional impairment was associated with an increased risk of death within 6 months after hospital discharge, but not with a significant risk of readmission. Simple performance-based assessment may represent a better prognostic measure for mortality than for readmission.

For peer review only

**REFERENCES**

1. Donzé J, Aujesky D, Williams D, Schnipper JL. Potentially avoidable 30-day hospital readmissions in medical patients: derivation and validation of a prediction model. *JAMA internal medicine* 2013;173:632-8.
2. Donzé J, Lipsitz S, Bates DW, Schnipper JL. Causes and patterns of readmissions in patients with common comorbidities: retrospective cohort study. *BMJ (Clinical research ed)* 2013;347:f7171.
3. Jencks SF, Williams MV, Coleman EA. Rehospitalizations among patients in the Medicare fee-for-service program. *The New England journal of medicine* 2009;360:1418-28.
4. Librero J, Peiro S, Ordinana R. Chronic comorbidity and outcomes of hospital care: length of stay, mortality, and readmission at 30 and 365 days. *Journal of clinical epidemiology* 1999;52:171-9.
5. Kansagara D, Englander H, Salanitro A, et al. Risk Prediction Models for Hospital Readmission: A Systematic Review. *JAMA* 2011;306(15):1688-1698.
6. Greysen SR, Covinsky KE. Functional status--an important but overlooked variable in the readmissions equation. *Journal of hospital medicine* 2014;9:330-1.
7. Hoyer EH, Needham DM, Miller J, Deuschendorf A, Friedman M, Brotman DJ. Functional status impairment is associated with unplanned readmissions. *Archives of physical medicine and rehabilitation* 2013;94:1951-8.
8. Depalma G, Xu H, Covinsky KE, et al. Hospital readmission among older adults who return home with unmet need for ADL disability. *The Gerontologist* 2013;53:454-61.
9. Burke RE, Whitfield EA, Hittle D, et al. Hospital Readmission From Post-Acute Care Facilities: Risk Factors, Timing, and Outcomes. *Journal of the American Medical Directors Association* 2016;17:249-55.

10. Hoyer EH, Needham DM, Atanelov L, Knox B, Friedman M, Brotman DJ. Association of impaired functional status at hospital discharge and subsequent rehospitalization. *Journal of hospital medicine* 2014;9:277-82.
11. Greysen SR, Stijacic Cenzer I, Auerbach AD, Covinsky KE. Functional impairment and hospital readmission in Medicare seniors. *JAMA internal medicine* 2015;175:559-65.
12. Nguyen HQ, Rondinelli J, Harrington A, et al. Functional status at discharge and 30-day readmission risk in COPD. *Respiratory medicine* 2015;109:238-46.
13. Tonkikh O, Shadmi E, Flaks-Manov N, Hoshen M, Balicer RD, Zisberg A. Functional status before and during acute hospitalization and readmission risk identification. *Journal of hospital medicine* 2016;11:636-41.
14. Smith DM, Katz BP, Huster GA, Fitzgerald JF, Martin DK, Freedman JA. Risk factors for nonelective hospital readmissions. *Journal of general internal medicine* 1996;11:762-4.
15. Coleman EA, Min SJ, Chomiak A, Kramer AM. Posthospital care transitions: patterns, complications, and risk identification. *Health services research* 2004;39:1449-65.
16. Hoeymans N, Wouters ER, Feskens EJ, van den Bos GA, Kromhout D. Reproducibility of performance-based and self-reported measures of functional status. *The journals of gerontology Series A, Biological sciences and medical sciences* 1997;52:M363-8.
17. Podsiadlo D, Richardson S. The timed "Up & Go": a test of basic functional mobility for frail elderly persons. *Journal of the American Geriatrics Society* 1991;39:142-8.
18. Beauchet O, Fantino B, Allali G, Muir SW, Montero-Odasso M, Annweiler C. Timed Up and Go test and risk of falls in older adults: a systematic review. *The journal of nutrition, health & aging* 2011;15:933-8.
19. Barry E, Galvin R, Keogh C, Horgan F, Fahey T. Is the Timed Up and Go test a useful predictor of risk of falls in community dwelling older adults: a systematic review and meta-analysis. *BMC geriatrics* 2014;14:14.

- 1  
2  
3  
4  
5  
6  
7  
8  
9  
10  
11  
12  
13  
14  
15  
16  
17  
18  
19  
20  
21  
22  
23  
24  
25  
26  
27  
28  
29  
30  
31  
32  
33  
34  
35  
36  
37  
38  
39  
40  
41  
42  
43  
44  
45  
46  
47  
48  
49  
50  
51  
52  
53  
54  
55  
56  
57  
58  
59  
60
20. Kojima G, Masud T, Kendrick D, et al. Does the timed up and go test predict future falls among British community-dwelling older people? Prospective cohort study nested within a randomised controlled trial. *BMC geriatrics* 2015;15:38.
  21. Okumiya K, Matsubayashi K, Nakamura T, et al. The timed "up & go" test is a useful predictor of falls in community-dwelling older people. *Journal of the American Geriatrics Society* 1998;46:928-30.
  22. Shumway-Cook A, Brauer S, Woollacott M. Predicting the probability for falls in community-dwelling older adults using the Timed Up & Go Test. *Physical therapy* 2000;80:896-903.
  23. Summary of the Updated American Geriatrics Society/British Geriatrics Society clinical practice guideline for prevention of falls in older persons. *Journal of the American Geriatrics Society* 2011;59:148-57.
  24. National Institute for Health and Care Excellence (UK). NICE clinical guidelines: assessment and prevention of falls in older people. 2013.
  25. Guideline for the prevention of falls in older persons. American Geriatrics Society, British Geriatrics Society, and American Academy of Orthopaedic Surgeons Panel on Falls Prevention. *Journal of the American Geriatrics Society* 2001;49:664-72.
  26. Nikolaus T, Bach M, Oster P, Schlierf G. Prospective value of self-report and performance-based tests of functional status for 18-month outcomes in elderly patients. *Aging (Milan, Italy)* 1996;8:271-6.
  27. Castro-Rodriguez M, Carnicero JA, Garcia-Garcia FJ, et al. Frailty as a Major Factor in the Increased Risk of Death and Disability in Older People With Diabetes. *Journal of the American Medical Directors Association* 2016.
  28. von Elm E, Altman DG, Egger M, Pocock SJ, Gøtzsche PC, Vandenbroucke JP. The Strengthening of Reporting of Observational Studies in Epidemiology (STROBE) Statement: guidelines for reporting observational studies. *International journal of surgery (London, England)* 2014;12:1495-9.



- 1  
2  
3  
4  
5  
6  
7  
8  
9  
10  
11  
12  
13  
14  
15  
16  
17  
18  
19  
20  
21  
22  
23  
24  
25  
26  
27  
28  
29  
30  
31  
32  
33  
34  
35  
36  
37  
38  
39  
40  
41  
42  
43  
44  
45  
46  
47  
48  
49  
50  
51  
52  
53  
54  
55  
56  
57  
58  
59  
60
29. Zweig MH, Campbell G. Receiver-operating characteristic (ROC) plots: a fundamental evaluation tool in clinical medicine. *Clinical chemistry* 1993;39:561-77.
30. Charlson ME, Pompei P, Ales KL, MacKenzie CR. A new method of classifying prognostic comorbidity in longitudinal studies: development and validation. *Journal of chronic diseases* 1987;40:373-83.
31. Sebastiao E, Sandroff BM, Learmonth YC, Motl RW. Validity of the Timed Up and Go Test as a Measure of Functional Mobility in Persons With Multiple Sclerosis. *Archives of physical medicine and rehabilitation* 2016;97:1072-7.
32. Gautschi OP, Smoll NR, Corniola MV, et al. Validity and Reliability of a Measurement of Objective Functional Impairment in Lumbar Degenerative Disc Disease: The Timed Up and Go (TUG) Test. *Neurosurgery* 2016;79:270-8.
33. Berg KO, Maki BE, Williams JI, Holliday PJ, Wood-Dauphinee SL. Clinical and laboratory measures of postural balance in an elderly population. *Archives of physical medicine and rehabilitation* 1992;73:1073-80.
34. Isles RC, Choy NL, Steer M, Nitz JC. Normal values of balance tests in women aged 20-80. *Journal of the American Geriatrics Society* 2004;52:1367-72.
35. Steffen TM, Hacker TA, Mollinger L. Age- and gender-related test performance in community-dwelling elderly people: Six-Minute Walk Test, Berg Balance Scale, Timed Up & Go Test, and gait speeds. *Physical therapy* 2002;82:128-37.
36. Janssen WG, Bussmann HB, Stam HJ. Determinants of the sit-to-stand movement: a review. *Physical therapy* 2002;82:866-79.
37. Vereeck L, Wuyts F, Truijen S, Van de Heyning P. Clinical assessment of balance: normative data, and gender and age effects. *International journal of audiology* 2008;47:67-75.
38. Boulgarides LK, McGinty SM, Willett JA, Barnes CW. Use of clinical and impairment-based tests to predict falls by community-dwelling older adults. *Physical therapy* 2003;83:328-39.

- 1  
2  
3  
4  
5  
6  
7  
8  
9  
10  
11  
12  
13  
14  
15  
16  
17  
18  
19  
20  
21  
22  
23  
24  
25  
26  
27  
28  
29  
30  
31  
32  
33  
34  
35  
36  
37  
38  
39  
40  
41  
42  
43  
44  
45  
46  
47  
48  
49  
50  
51  
52  
53  
54  
55  
56  
57  
58  
59  
60
39. Garland SJ, Stevenson TJ, Ivanova T. Postural responses to unilateral arm perturbation in young, elderly, and hemiplegic subjects. *Archives of physical medicine and rehabilitation* 1997;78:1072-7.
40. Herman T, Giladi N, Hausdorff JM. Properties of the 'timed up and go' test: more than meets the eye. *Gerontology* 2011;57:203-10.
41. Sletvold O, Tilvis R, Jonsson A, et al. Geriatric work-up in the Nordic countries. The Nordic approach to comprehensive geriatric assessment. *Danish medical bulletin* 1996;43:350-9.

For peer review only

**Table 1.** Baseline characteristics of the entire cohort, and according to the presence of functional impairment at discharge of index admission.

| Variable                               | TUG test duration   | TUG test duration   |
|----------------------------------------|---------------------|---------------------|
|                                        | ≥15 seconds (n=129) | <15 seconds (n=209) |
| Age, years                             | 80 (72-86)          | 70 (61-79)          |
| Men                                    | 47 (36.4)           | 121 (57.9)          |
| Charlson comorbidity index             | 8 (6-10)            | 6 (4-8)             |
| Multimorbidity *                       | 125 (96.9)          | 177 (84.7)          |
| Previous admission †                   | 49 (38.0)           | 46 (22.0)           |
| Duration of TUG test, seconds          | 23 (18-34)          | 10 (8-12)           |
| <b>Hospitalization characteristics</b> |                     |                     |
| Elective                               | 2 (1.6)             | 11 (5.3)            |
| Lengths of stay, days                  | 9 (6-15)            | 5 (4-9)             |
| <b>Diagnosis of index admission</b>    |                     |                     |
| Cardiovascular disease ‡               | 39 (30.2)           | 52 (24.9)           |
| Infection                              | 26 (20.2)           | 41 (19.6)           |
| Neuropsychiatric disease §,            | 18 (14.0)           | 47 (22.5)           |
| Oncological disease                    | 12 (9.3)            | 14 (6.7)            |
| Respiratory disease §                  | 11 (8.5)            | 19 (9.1)            |
| Other                                  | 11 (8.5)            | 5 (2.4)             |
| Gastrointestinal disease §             | 4 (3.1)             | 14 (6.7)            |
| Osteoarticular disease §               | 4 (3.1)             | 6 (2.9)             |
| Endocrine or metabolic disease         | 4 (3.1)             | 7 (3.4)             |
| Renal disease ‡                        | 0 (0.0)             | 4 (1.9)             |

Data are n (% of column) or median (interquartile range).

Functional impairment was defined as a TUG test duration  $\geq$  15 seconds.

\* Two or more comorbidities as recorded in the Charlson comorbidity index.

† Hospital admission(s) during the 6 months preceding index admission.

‡ Including ischemic/thrombotic disorder, congestive heart failure, arrhythmia.

§ Other than infection.

|| Including dementia, alcohol disorder, intoxication.

**Table 2.** Causes of unplanned readmission within 6 months of discharge, according to the presence for functional impairment.

| <b>Diagnosis category</b>      | TUG test duration<br>≥ 15 seconds (n=46) | TUG test duration<br>< 15 seconds (n=61) |
|--------------------------------|------------------------------------------|------------------------------------------|
| Cardiovascular disease *, †    | 10 (21.7)                                | 12 (19.7)                                |
| Infection                      | 9 (19.6)                                 | 7 (11.5)                                 |
| Oncological disease            | 7 (15.2)                                 | 11 (18.0)                                |
| Respiratory disease            | 6 (13.0)                                 | 7 (11.5)                                 |
| Neuropsychiatric disease *, ‡  | 5 (10.9)                                 | 7 (11.5)                                 |
| Gastro-intestinal disease *    | 3 (6.5)                                  | 6 (9.8)                                  |
| Osteoarticular disease *       | 2 (4.4)                                  | 5 (8.2)                                  |
| Endocrine or metabolic disease | 2 (4.4)                                  | 3 (4.9)                                  |
| Other / unknown                | 2 (4.4)                                  | 3 (4.9)                                  |
| Renal disease *                | 1 (2.2)                                  | 2 (3.3)                                  |

Data are n (%).

Functional impairment was defined as a TUG test duration ≥ 15 seconds.

\* Other than infection..

† Including ischemic/thrombotic disorder, congestive heart failure, arrhythmia.

‡ Including dementia, alcohol disorder, intoxication

**Figure 1.** Study flow diagram.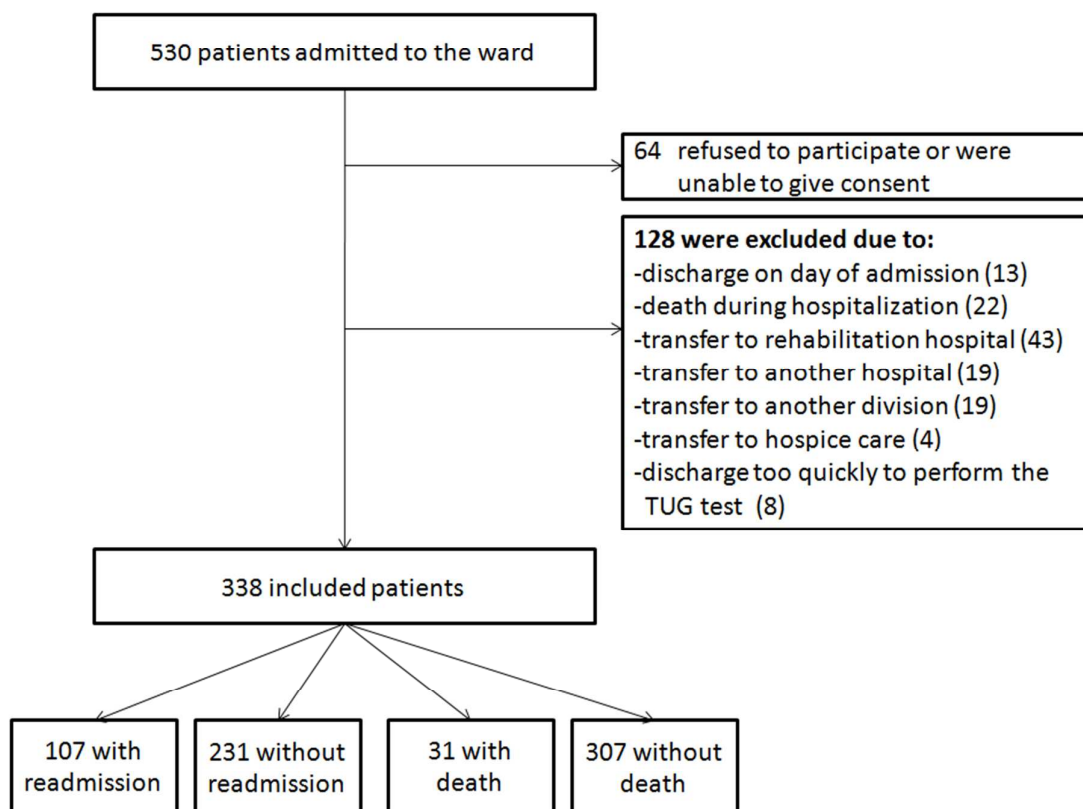

STROBE Statement—Checklist of items that should be included in reports of *cohort studies*

|                              | Item No | Recommendation                                                                                                                                                                                                                                                                                                                                                                                                | Page                                   |
|------------------------------|---------|---------------------------------------------------------------------------------------------------------------------------------------------------------------------------------------------------------------------------------------------------------------------------------------------------------------------------------------------------------------------------------------------------------------|----------------------------------------|
| <b>Title and abstract</b>    | 1       | (a) Indicate the study's design with a commonly used term in the title or the abstract<br>(b) Provide in the abstract an informative and balanced summary of what was done and what was found                                                                                                                                                                                                                 | 1<br>2                                 |
| <b>Introduction</b>          |         |                                                                                                                                                                                                                                                                                                                                                                                                               |                                        |
| Background/rationale         | 2       | Explain the scientific background and rationale for the investigation being reported                                                                                                                                                                                                                                                                                                                          | 4                                      |
| Objectives                   | 3       | State specific objectives, including any prespecified hypotheses                                                                                                                                                                                                                                                                                                                                              | 4                                      |
| <b>Methods</b>               |         |                                                                                                                                                                                                                                                                                                                                                                                                               |                                        |
| Study design                 | 4       | Present key elements of study design early in the paper                                                                                                                                                                                                                                                                                                                                                       | 5                                      |
| Setting                      | 5       | Describe the setting, locations, and relevant dates, including periods of recruitment, exposure, follow-up, and data collection                                                                                                                                                                                                                                                                               | 5                                      |
| Participants                 | 6       | (a) Give the eligibility criteria, and the sources and methods of selection of participants. Describe methods of follow-up<br>(b) For matched studies, give matching criteria and number of exposed and unexposed                                                                                                                                                                                             | 5-6<br>NA                              |
| Variables                    | 7       | Clearly define all outcomes, exposures, predictors, potential confounders, and effect modifiers. Give diagnostic criteria, if applicable                                                                                                                                                                                                                                                                      | 5-6                                    |
| Data sources/<br>measurement | 8*      | For each variable of interest, give sources of data and details of methods of assessment (measurement). Describe comparability of assessment methods if there is more than one group                                                                                                                                                                                                                          | 5-7                                    |
| Bias                         | 9       | Describe any efforts to address potential sources of bias                                                                                                                                                                                                                                                                                                                                                     | 7                                      |
| Study size                   | 10      | Explain how the study size was arrived at                                                                                                                                                                                                                                                                                                                                                                     | 5                                      |
| Quantitative variables       | 11      | Explain how quantitative variables were handled in the analyses. If applicable, describe which groupings were chosen and why                                                                                                                                                                                                                                                                                  | 7                                      |
| Statistical methods          | 12      | (a) Describe all statistical methods, including those used to control for confounding<br>(b) Describe any methods used to examine subgroups and interactions<br>(c) Explain how missing data were addressed<br>(d) If applicable, explain how loss to follow-up was addressed<br>(e) Describe any sensitivity analyses                                                                                        | 7                                      |
| <b>Results</b>               |         |                                                                                                                                                                                                                                                                                                                                                                                                               |                                        |
| Participants                 | 13*     | (a) Report numbers of individuals at each stage of study—eg numbers potentially eligible, examined for eligibility, confirmed eligible, included in the study, completing follow-up, and analysed<br>(b) Give reasons for non-participation at each stage<br>(c) Consider use of a flow diagram                                                                                                               | 8<br>+ Figure 1<br>5+Fig 1<br>Figure 1 |
| Descriptive data             | 14*     | (a) Give characteristics of study participants (eg demographic, clinical, social) and information on exposures and potential confounders<br>(b) Indicate number of participants with missing data for each variable of interest<br>(c) Summarise follow-up time (eg, average and total amount)                                                                                                                | 8+Table<br>7+Fig. 1<br>8               |
| Outcome data                 | 15*     | Report numbers of outcome events or summary measures over time                                                                                                                                                                                                                                                                                                                                                | 8                                      |
| Main results                 | 16      | (a) Give unadjusted estimates and, if applicable, confounder-adjusted estimates and their precision (eg, 95% confidence interval). Make clear which confounders were adjusted for and why they were included<br>(b) Report category boundaries when continuous variables were categorized<br>(c) If relevant, consider translating estimates of relative risk into absolute risk for a meaningful time period | 8-9<br>8-9<br>NA                       |

|    |                          |    |                                                                                        |       |
|----|--------------------------|----|----------------------------------------------------------------------------------------|-------|
| 1  | Other analyses           | 17 | Report other analyses done—eg analyses of subgroups and interactions, and              |       |
| 2  |                          |    | sensitivity analyses                                                                   | 9     |
| 3  | <hr/>                    |    |                                                                                        |       |
| 4  | <b>Discussion</b>        |    |                                                                                        |       |
| 5  | Key results              | 18 | Summarise key results with reference to study objectives                               | 10    |
| 6  | Limitations              | 19 | Discuss limitations of the study, taking into account sources of potential bias or     |       |
| 7  |                          |    | imprecision. Discuss both direction and magnitude of any potential bias                | 3+11  |
| 8  | Interpretation           | 20 | Give a cautious overall interpretation of results considering objectives, limitations, |       |
| 9  |                          |    | multiplicity of analyses, results from similar studies, and other relevant evidence    | 10-12 |
| 10 | Generalisability         | 21 | Discuss the generalisability (external validity) of the study results                  | 11    |
| 11 | <hr/>                    |    |                                                                                        |       |
| 12 | <b>Other information</b> |    |                                                                                        |       |
| 13 | Funding                  | 22 | Give the source of funding and the role of the funders for the present study and, if   |       |
| 14 |                          |    | applicable, for the original study on which the present article is based               | 1     |

15 \*Give information separately for exposed and unexposed groups.

16  
17  
18  
19  
20  
21 **Note:** An Explanation and Elaboration article discusses each checklist item and gives methodological background and  
22 published examples of transparent reporting. The STROBE checklist is best used in conjunction with this article (freely  
23 available on the Web sites of PLoS Medicine at <http://www.plosmedicine.org/>, Annals of Internal Medicine at  
24 <http://www.annals.org/>, and Epidemiology at <http://www.epidem.com/>). Information on the STROBE Initiative is  
25 available at <http://www.strobe-statement.org>.  
26  
27  
28  
29  
30  
31  
32  
33  
34  
35  
36  
37  
38  
39  
40  
41  
42  
43  
44  
45  
46  
47  
48  
49  
50  
51  
52  
53  
54  
55  
56  
57  
58  
59  
60

# BMJ Open

## Performance-based functional impairment and readmission and death: a prospective study

|                                 |                                                                                                                                                                                                                                                                                                                                                                                                                                                                                                                                            |
|---------------------------------|--------------------------------------------------------------------------------------------------------------------------------------------------------------------------------------------------------------------------------------------------------------------------------------------------------------------------------------------------------------------------------------------------------------------------------------------------------------------------------------------------------------------------------------------|
| Journal:                        | <i>BMJ Open</i>                                                                                                                                                                                                                                                                                                                                                                                                                                                                                                                            |
| Manuscript ID                   | bmjopen-2017-016207.R1                                                                                                                                                                                                                                                                                                                                                                                                                                                                                                                     |
| Article Type:                   | Research                                                                                                                                                                                                                                                                                                                                                                                                                                                                                                                                   |
| Date Submitted by the Author:   | 22-Mar-2017                                                                                                                                                                                                                                                                                                                                                                                                                                                                                                                                |
| Complete List of Authors:       | Aubert, Carole; Inselspital, Bern University Hospital, University of Bern, General Internal Medicine<br>Folly, Antoine; HFR Fribourg Hopital cantonal, General Internal Medicine<br>Mancinetti, Marco; HFR Fribourg Hopital cantonal, General Internal Medicine<br>Hayoz, Daniel; HFR Fribourg Hopital cantonal, General Internal Medicine<br>Donzé, Jacques; Inselspital, Bern University Hospital, University of Bern, General Internal Medicine; Brigham and Women's Hospital Department of Medicine, General Medicine and Primary Care |
| <b>Primary Subject Heading</b>: | General practice / Family practice                                                                                                                                                                                                                                                                                                                                                                                                                                                                                                         |
| Secondary Subject Heading:      | Epidemiology, Geriatric medicine, Public health, Rehabilitation medicine                                                                                                                                                                                                                                                                                                                                                                                                                                                                   |
| Keywords:                       | readmission, death, functional status, Timed Up and Go                                                                                                                                                                                                                                                                                                                                                                                                                                                                                     |
|                                 |                                                                                                                                                                                                                                                                                                                                                                                                                                                                                                                                            |

SCHOLARONE™  
Manuscripts

Only



1  
2  
3  
4  
5  
6  
7  
8  
9  
10  
11  
12  
13  
14  
15  
16  
17  
18  
19  
20  
21  
22  
23  
24  
25  
26  
27  
28  
29  
30  
31  
32  
33  
34  
35  
36  
37  
38  
39  
40  
41  
42  
43  
44  
45  
46  
47  
48  
49  
50  
51  
52  
53  
54  
55  
56  
57  
58  
59  
60

## Performance-based functional impairment and readmission and death: a prospective study

**Running head:** Functional status, readmission and death

**Authors:** Carole E Aubert, MD<sup>1,2</sup>, Antoine Folly<sup>2</sup>, Mancinetti Marco, MD<sup>2</sup>, Daniel Hayoz, MD<sup>2</sup>, Jacques D Donzé, MD, MSc<sup>1,3,4</sup>.

**Authors affiliations:** <sup>1</sup> Department of General Internal Medicine, Inselspital, Bern University Hospital, University of Bern, Bern, Switzerland. <sup>2</sup> Department of General Internal Medicine, Fribourg Cantonal Hospital, Fribourg, Switzerland. <sup>3</sup> Division of General Medicine and Primary Care, Brigham and Women's Hospital, Boston, Massachusetts, USA. <sup>4</sup> Harvard Medical School, Boston, Massachusetts, USA.

**Corresponding author:**

Carole E Aubert, MD, Department of General Internal Medicine, Inselspital, Bern University Hospital, Freiburgstrasse, 3010 Bern, Switzerland.

Email: caroleelodie.aubert@insel.ch; phone: +41 31 632 21 11; fax: +41 31 632 88 85.

**Authors contribution:** All authors had access to the data during the study. Dr Aubert takes responsibility for the integrity of the data and the accuracy of the data analysis and is the guarantor. *Study concept and design:* Aubert, Donzé, Hayoz, Mancinetti. *Acquisition of data:* Aubert, Folly, Mancinetti. *Analysis and interpretation of data:* Aubert, Donzé. *Drafting of the manuscript:* Aubert, Donzé. *Critical revision of the manuscript for important intellectual content:* Hayoz, Folly, Mancinetti.

**Funding source:** This research received no specific grant from any funding agency in the public, commercial or not-for-profit sectors.

**Conflict of interest and acknowledgment:** Nothing to declare.

**Word count:** 3077.

**Abstract word count:** 237.

**Key words:** readmission, death, functional status, Timed Up and Go.

**Category:** Original Article.

## ABSTRACT

### Objectives

Readmission and death are frequent after a hospitalization and difficult to predict. While many predictors have been identified, few studies have focused on functional status. We assessed whether performance-based functional impairment at discharge is associated with readmission and death after an acute medical hospitalization.

### Design, setting and participants

We prospectively included patients aged  $\geq 50$  years admitted to the Department of General Internal Medicine of a large community hospital. Functional status was assessed shortly before discharge using the Timed Up and Go test performed twice in a standard way by trained physiotherapists, and defined as a test duration  $\geq 15$  seconds. Sensitivity analyses using a cut-off at  $>10$  and  $>20$  seconds were performed.

### Primary and secondary outcome measures

The primary and secondary outcome measures were unplanned readmission and death, respectively, within 6 months after discharge.

### Results

Within 6 months after discharge, 107/338 (31.7%) patients had an unplanned readmission and 31/338 (9.2%) died. Functional impairment was associated with higher risk of death (OR 2.44, 95% CI 1.15-5.18), but not with unplanned readmission (OR 1.34, 95% CI 0.84-2.15). No significant association was found between functional impairment and the total number of unplanned readmissions (adjusted OR 1.59, 95% CI 0.95-2.67).

### Conclusions

Functional impairment at discharge of an acute medical hospitalization was associated with higher risk of death, but not of unplanned readmission within 6 months after discharge. Simple performance-based assessment may represent a better prognostic measure for mortality than for readmission.

## ARTICLE SUMMARY

### Strengths and limitations of this study

- ❖ Large prospective cohort study evaluating the association of performance-based assessment with readmissions and death in medical inpatients aged  $\geq 50$  years
- ❖ Long follow-up time of 6 months without loss to follow-up
- ❖ Assessment of both readmissions and deaths, separately
- ❖ Single center study including only medical patients

**DATA SHARING STATEMENT:** There are no unpublished data from the study.

## INTRODUCTION

1  
2  
3  
4 After an acute care hospitalization, readmissions are frequent, affecting 14-22% of the patients  
5 within 30 days after hospital discharge, and are associated with significant costs as well for the  
6 patients themselves as for the healthcare systems.<sup>1-3</sup> Factors that contribute to readmission are  
7 manifolds, including multimorbidity, complication of medical treatment, length of hospital stay,  
8 number of previous hospitalizations, socio-economic factors, care coordination, monitoring,  
9 follow-up care, and/or home support.<sup>1,4,5</sup> In this complex equation, patient's functional impairment  
10 could intuitively be considered as a potential predictor for readmission, as it may capture overall  
11 health status, including cardiorespiratory reserve and risk of falls altogether.<sup>6,7</sup>

12  
13 Few studies assessed the association between performance-based functional impairment and  
14 readmission.<sup>8-16</sup> Although those studies reported mainly a significant association between  
15 functional impairment and readmission, they were often limited by a retrospective design, or by  
16 focusing on a specific setting such as surgical ward or rehabilitation care facilities, or on specific  
17 populations such as older adults or patients with chronic obstructive pulmonary disease or  
18 myocardial infarction. Functional impairment has also been associated with mortality in several  
19 studies in ambulatory care settings,<sup>16-25</sup> while the few studies assessing this outcome after a  
20 hospitalization found controversial results.<sup>12,14,26</sup>

21  
22 Performance-based functional methods have been shown to perform better than self-reported  
23 assessment.<sup>27</sup> One of the former is the Timed Up and Go (TUG) test, a brief, objective and simple  
24 assessment of functional status that doesn't require any special competence or equipment,  
25 allowing a wide use in everyday practice.<sup>28</sup> Unlike many tools to assess functional status, the TUG  
26 test gives information both on balance and cardiorespiratory capacity, and was associated with  
27 overall health decline.<sup>6</sup> It has been also shown not to suffer from ceiling effect limitations, and to  
28 be related to executive function.<sup>29</sup> These characteristics make it a good potential tool to assess the  
29 risk of readmission. We therefore hypothesized that the TUG test may be a good predictor of  
30 adverse health outcomes, such as readmission.

1  
2  
3  
4  
5  
6  
7  
8  
9  
10  
11  
12  
13  
14  
15  
16  
17  
18  
19  
20  
21  
22  
23  
24  
25  
26  
27  
28  
29  
30  
31  
32  
33  
34  
35  
36  
37  
38  
39  
40  
41  
42  
43  
44  
45  
46  
47  
48  
49  
50  
51  
52  
53  
54  
55  
56  
57  
58  
59  
60

In summary, although the TUG test has been associated with death and to a lesser extent with readmission, few studies looked at the predictability of the TUG test in a broader population such as general medical inpatients. Our aim was therefore to assess the association of performance-based functional impairment at discharge of an acute medical hospitalization with unplanned readmission and death in a prospective cohort study including medical patients aged 50 years or older.

For peer review only

## MATERIALS AND METHODS

Reporting is in accordance with the *STrengthening the Reporting of OBservational studies in Epidemiology (STROBE)* statement.<sup>30</sup>

### Study design and population

In a prospective cohort study, we included all consecutive patients aged  $\geq 50$  years admitted to the Department of General Internal Medicine of a large secondary care hospital in Switzerland (Fribourg Cantonal Hospital, 115 beds, 4400 admissions/year), between April and September 2013. Our exclusion criteria were: 1) discharge the day of admission; 2) discharge to another acute care clinic, a rehabilitation setting, a palliative care clinic or another division of the same hospital; 3) death during the index hospitalization; 4) refusal or inability to give informed consent. The study complies with the Declaration of Helsinki and local ethics committee (Commission d'éthique de recherche, Direction de la santé et des affaires sociales, Fribourg, Switzerland) approved the study. For this observational cohort without intervention, we didn't perform a sample size calculation, and limited the sample size due to the resources available.

### Outcomes

We defined our primary outcome as the first unplanned readmission to any division of any acute care hospital, and our secondary outcome as death, both within 6 months after discharge of index hospitalization. We defined planned readmission as scheduled hospitalization for investigation (e.g. elective bronchoscopy) or for not emergent treatment (e.g. planned radiotherapy for oncological treatment). All patients were contacted by phone call 6 months after discharge in order to record our outcomes. If we failed to reach the patient directly, we phoned the general practitioner, a next of kin, or the nursing home, depending on each situation. To increase reliability, we additionally checked in the electronic health record for any readmission or death recorded within the network of Fribourg hospitals, which includes the 3 acute care hospitals of the

1 same region (Fribourg, Riaz, and Tavel), and 4 rehabilitation centers (Billens, Murten, Riaz,  
2 Tavel).  
3  
4  
5

### 6 **Functional status assessment**

7  
8 Patients performed the TUG test before discharge, according to its original description.<sup>28</sup> They  
9 were instructed to stand up from a chair without using their arms, walk 3 meters ahead (distance  
10 was marked on the floor), turn around, walk back to the chair and sit down. The duration to  
11 complete the test was timed by a stopwatch and recorded in seconds, beginning on the command  
12 “go” given to the patient, and ending after he/she had sit down and leaned against the back of the  
13 chair. The test was performed twice and the shortest time, indicating the best performance, was  
14 used for the analyses. Patients were allowed to use routine walking aids if needed (e.g. crutches or  
15 walker), but did not receive any physical assistance. Only 3 different trained physiotherapists  
16 performed the TUG test to all the cohort population. Patients who were too debilitated to perform  
17 the test were classified as having functional impairment.  
18  
19  
20  
21  
22  
23  
24  
25  
26  
27  
28  
29

30 We decided to dichotomize the results of the TUG test instead of using it as a continuous variable  
31 or in a higher number of categories, because we thought that classifying patients at high versus  
32 low risk of readmission or death would be more useful to interpret for clinicians. As we found no  
33 agreement in the literature for a specific duration to sort out patients with functional impairment,<sup>7</sup>  
34 we used the receiver operating characteristic (ROC) curve to define the optimal cutoff level  
35 associated with our outcomes. For this purpose, we used the point closest to the top left corner of  
36 the ROC curve, because it represents the best compromise between sensitivity and specificity.<sup>31</sup>  
37  
38  
39  
40  
41  
42  
43  
44  
45  
46  
47  
48  
49  
50  
51  
52  
53  
54  
55  
56  
57  
58  
59  
60

Functional impairment was defined as a TUG test duration longer than the cutoff level that we identified. The areas under the ROC curves were 0.57 (95% confidence interval [CI] 0.51-0.64) for 6-month unplanned readmission and 0.63 (95% CI 0.54-0.73) for 6-month death. Both ROC curves identified the optimal cutoff level at 15 seconds. At this cutoff level, the sensitivity was 39.2% and 58.1% for unplanned readmission and death, respectively, and the specificity 66.1% and 64.1%.

## Covariates

Socio-demographic data, number of hospitalizations during the 6 months before index admission and clinical information were recorded at baseline. Comorbidity was assessed by the Charlson comorbidity index, which attributes a number of points of 1,2,3 or 6 to different medical conditions, depending on their severity,<sup>32</sup> and multimorbidity was defined as the presence of at least 2 chronic diseases according to this index. The main diagnoses of index admission were retrieved from medical records and divided into 10 categories, according to the system affected: 1) osteoarticular disease; 2) gastrointestinal disease; 3) infection; 4) neuropsychiatric disease (including dementia, alcohol disorder and intoxication); 5) respiratory disease; 6) oncological disease; 7) endocrine or metabolic disease; 8) renal disease; 9) cardiovascular disease; 10) other.

## Data analysis

We presented continuous variables as median with interquartile range (IQR) because of their non-normal distribution, and compared them using nonparametric K-sample test on the equality of medians. Categorical variables were presented as frequency and percentage and compared using Pearson's chi-squared test.

Univariate logistic regression analysis was used to assess the association between functional impairment and unplanned readmission and death, respectively, within 6 months after hospital discharge. Multivariate analysis was adjusted for age and gender. A collinearity diagnostic measurement was performed to detect collinearity between the variables included in the model.<sup>33</sup>

A link test was used to confirm that the linear approach to model the outcome was correct.<sup>34</sup> We used age as a continuous variable because assessing the variable in categories or after cubic or quadratic transformation yielded similar results. Model fit was assessed using the Hosmer-Lemeshow goodness-of-fit test.<sup>35</sup>

We performed two sensitivity analyses including 8 patients with missing data for the TUG test.

We defined the duration of their non-performed TUG test as  $\geq 15$  seconds in the first one (i.e.



1 functional impairment), and as <15 seconds in the second one (i.e. no functional impairment). As  
2 there was no agreement for a specific cutoff when dichotomizing the TUG test duration,<sup>7</sup> although  
3  
4 we used a validated method to select it,<sup>31</sup> we also performed additional sensitivity analyses with  
5  
6 the cutoff set at >10 and >20 seconds, respectively, as done in previous studies.<sup>12,14,22</sup> We finally  
7  
8 performed a sensitivity analysis excluding the patients who were too debilitated to perform the  
9  
10 test. A two sided  $P < 0.05$  was considered to indicate statistical significance. All analyses were  
11  
12 performed using STATA release 13.0 (StataCorp LP, College Station, Texas).  
13  
14  
15  
16  
17  
18  
19  
20  
21  
22  
23  
24  
25  
26  
27  
28  
29  
30  
31  
32  
33  
34  
35  
36  
37  
38  
39  
40  
41  
42  
43  
44  
45  
46  
47  
48  
49  
50  
51  
52  
53  
54  
55  
56  
57  
58  
59  
60

For peer review only

## RESULTS

We included 338 patients (Figure 1) and had no lost to follow-up, as we managed to get the outcome information per phone call (to the patient or to the general practitioner, a next of kin, or the nursing home) for all patients. Median age was 73 (IQR 65-83) years with 168 (49.7%) men. Median Charlson comorbidity index was 5 (IQR 7-9) and 302 (89.4%) of the patients had multimorbidity. Median length of stay for index hospitalization was 7 (IQR 4-12) days. Within 6 months after discharge, 107 (31.7%) patients had an unplanned readmission and 31 (9.2%) died. Among the 31 patients who died, 23 (74.2%) had been previously readmitted. Patients with functional impairment were older and more likely to be women and to have been admitted to hospital within the 6 months before index admission ( $P < 0.003$  for all). They had also a higher Charlson comorbidity index and a longer length of stay ( $P < 0.001$  for all). Cardiovascular, infectious and neuropsychiatric diseases were the 3 most frequent main diagnoses of index hospitalization, with 91 (27%), 67 (20%), and 65 (19%) cases, respectively.

### **Association of functional impairment with unplanned readmission and death**

Table 1 and Table 2 show the baseline characteristics according to the presence or absence of readmission or death, respectively. The median duration of the TUG test was 13 (IQR 10-19) seconds for patients with an unplanned readmission, and 12 (IQR 8-18) seconds for those without any unplanned readmission ( $P = 0.34$ ). The TUG test duration was significantly longer among patients who died (median [IQR] duration: 17 [11-21] versus 12 [8-18] seconds,  $P = 0.04$ ). The duration of the TUG test was  $\geq 15$  seconds in 46 (43.0%) of the 107 patients with an unplanned readmission and in 18 (58.1%) of the patients who died within 6 months after hospital discharge. Functional impairment was associated with a higher risk of death within 6 months after discharge (odds ratio [OR] 2.44, 95% CI 1.15-5.18), while the risk of unplanned readmission was not significantly increased (OR 1.34, 95% CI 0.84-2.15). After adjusting for age and gender, the association was even stronger for death (OR 3.55, 95% CI 1.52-8.25), but remained unchanged for

1  
2  
3  
4  
5  
6  
7  
8  
9  
10  
11  
12  
13  
14  
15  
16  
17  
18  
19  
20  
21  
22  
23  
24  
25  
26  
27  
28  
29  
30  
31  
32  
33  
34  
35  
36  
37  
38  
39  
40  
41  
42  
43  
44  
45  
46  
47  
48  
49  
50  
51  
52  
53  
54  
55  
56  
57  
58  
59  
60

unplanned readmission (OR 1.58, 95% CI 0.94-2.64). We found no significant association between functional impairment and the absolute total number of unplanned readmissions within 6 months (unadjusted OR 1.34, 95% CI 0.84-2.15, adjusted OR 1.59, 95% CI 0.95-2.67). *P* for the Hosmer-Lemeshow goodness-of-fit test was > 0.05 for both adjusted models, indicating good fit. The variance inflation factors and tolerance were near 1.00 for all variables, excluding significant collinearity. The link test confirmed that the linear approach to model the outcomes was correct. In both sensitivity analyses including the 8 patients with missing data for the TUG test, results remained similar, with a significant increased risk of death, but not of readmission: sensitivity analysis defining patients with missing data as functional impaired (TUG test duration  $\geq 15$  seconds): adjusted OR 3.57, 95% CI 1.57-8.08 for death, adjusted OR 1.77, 95% CI 1.07-2.92 for readmission. Sensitivity analysis defining patients with missing data as non-functional impaired (TUG test duration <15 seconds): adjusted OR 2.93, 95% CI 1.31-6.56 for death, adjusted OR 1.43, 95% CI 0.86-2.37 for readmission. Results were similar in the sensitivity analyses setting the cutoff point at >10 or >20 seconds, respectively: OR 1.67 (95% CI 0.97-2.86) and 1.32 (95% CI 0.74-2.35) for readmission, and 2.69 (95% CI 1.09-6.67) and 2.64 (95% CI 1.11-6.30) for death, as well as in the sensitivity analysis excluding 12 patients who were too debilitated to perform the TUG test (OR 4.16, 95% CI 1.76-9.83 for death; OR 1.50, 95% CI 0.88-2.55).

## CONCLUSIONS

1  
2  
3  
4 In this prospective cohort study, we found that functional impairment, defined as  $\geq 15$  seconds to  
5 perform the validated performance-based “Timed Up and Go test” before acute care hospital  
6 discharge, was associated with an almost 150% increase in the risk of death within 6 months after  
7 hospital discharge. Conversely, functional impairment was not associated with an increased risk of  
8 unplanned readmission.  
9

10  
11 These findings contrast with previous studies in which functional impairment was mostly  
12 positively associated with a higher risk of readmission.<sup>8-13</sup> Several reasons may explain this  
13 difference.  
14

15  
16 First, we used the TUG test, which has been largely validated as a simple, quick, and reliable  
17 clinical method to assess functional status,<sup>28,36-40</sup> and presents several advantages in comparison  
18 with other tools to assess functional status. The TUG test is objective, and its very high inter-rater  
19 and test-retest reliability allows better comparability than other tools.<sup>28,40,41</sup> Although this measure  
20 is very simple, it is actually constituted of several complex sequences (e.g. moving from the sitting  
21 to the standing position), each of which evaluating multiple aspects needed for adequate functional  
22 status, including balance, mobility, cardiorespiratory function, and coordination.<sup>42</sup> It may therefore  
23 capture several factors such as disease severity, independently of the kind of disease, and may as  
24 such be a good proxy to predict overall health decline.<sup>6,7</sup> Moreover, as opposed to other tools used  
25 to assess functional status,<sup>43-45</sup> the TUG test does not suffer from ceiling or floor effects in healthy  
26 older adults.<sup>29</sup> Furthermore, a physiotherapist is not absolutely needed, as it can be performed by  
27 nursing personal as well.<sup>46,47</sup>  
28  
29  
30  
31  
32  
33  
34  
35  
36  
37  
38  
39  
40  
41  
42  
43  
44  
45  
46

47  
48 Second, we included only patients discharged directly home or to a nursing home, while others  
49 focused on patients discharged to a rehabilitation care facility.<sup>8</sup> Patients discharged to a  
50 rehabilitation clinic may be more functionally impaired and have a higher morbidity level than  
51 other patients at discharge from the acute care setting. Conversely, we can suppose that functional  
52 status will be improved by the rehabilitation stay, which may consequently lower the following  
53  
54  
55  
56  
57  
58  
59  
60

1 risk of readmission or death. Similarly, other authors evaluated functional status at admission  
2 before an elective operation, at the time of discharge from the emergency department, or one  
3 month after discharge.<sup>11,15,16</sup> We may suppose that all those patients have a better functional status  
4 than our population, as the acute care hospitalization may affect functional status, limiting  
5 comparability with our study.  
6  
7

8  
9  
10 Third, we focused on medical patients aged 50 years or older, while others studied older adults,<sup>9-  
11 12,15</sup> or patients with a specific disease, such as chronic obstructive pulmonary disease or  
12 myocardial infarction.<sup>11,13</sup> Fourth and finally, we included only unplanned readmissions, while  
13 many previous studies included elective readmissions in the primary outcome.<sup>8,10-14,16</sup> Two other  
14 findings in our study support the absence of association between functional impairment and  
15 readmission. First, the number of hospitalizations in the 6 months following discharge was not  
16 significantly higher in the group of patients with functional impairment. Second, sensitivity  
17 analyses using other cutoff points to define functional impairment yielded similar results.  
18  
19

20 Interestingly, we found a significant association between functional impairment and death within 6  
21 months after hospital discharge. Only few studies looked at this relationship between functional  
22 impairment and mortality following discharge.<sup>12,14,26</sup> Two of them, which included 135 geriatric  
23 and 495 medical inpatients, respectively, were negative,<sup>14,26</sup> while another study using the TUG  
24 test in 147 geriatric inpatients found an association.<sup>12</sup> Our results are consistent with studies  
25 performed in ambulatory care settings.<sup>16-24</sup> All these findings together support that functional  
26 impairment may rather be a predictor for mortality than for readmission.  
27  
28

29 If confirmed by larger studies in general medical inpatients, our findings may have two main  
30 clinical implications. First, it may help to identify high-risk patients who would most likely benefit  
31 from interventions that have been shown to improve functional status.<sup>10,48</sup> However, further  
32 studies are needed to assess if these interventions can improve patients' outcome also. Second, it  
33 may help clinicians to assess the risk of short-term death of their patients, and to consequently  
34 tailor preventive and therapeutic care to each patient. Some drugs or preventive prescriptions, such  
35 as cancer screening, may indeed more harm than benefit to those high-risk patients unlikely to  
36  
37  
38  
39  
40  
41  
42  
43  
44  
45  
46  
47  
48  
49  
50  
51  
52  
53  
54  
55  
56  
57  
58  
59  
60

1 survive long enough to benefit from the intervention. The TUG test may therefore represent an  
2 easy-to-use and reliable tool for clinicians to improve assessment of patients' life expectancy. As  
3  
4 our results were similar when including or excluding patients who were too debilitated to perform  
5  
6 the test, our findings may apply to those patients also, if classified as functionally impaired.  
7  
8 Furthermore, our simple model adjusting only for age and gender lets suppose that other variables  
9  
10 are not needed to predict the risk of death, which may be useful for clinical implementation.  
11

12  
13 Our findings should be considered in light of some limitations. First, our sample was relatively  
14  
15 small. Second, the study was conducted in a single center and included only medical patients,  
16  
17 limiting the generalizability of our results; however, except for age, our population was otherwise  
18  
19 unselected. Third, we excluded patients who were discharged to a rehabilitation facility, because  
20  
21 we hypothesized that their functional status at discharge of the acute care setting would not reflect  
22  
23 their actual functional status at discharge of the rehabilitation clinic. Our findings may therefore  
24  
25 not apply to these patients. Fourth, although we may not exclude residual confounding factors, the  
26  
27 aim of our study was to evaluate the performance of the TUG test as a simple overall prediction  
28  
29 measure and not as an independent risk factor. Therefore, we adjusted only for age and gender.  
30  
31

32  
33 Our study has some strengths. First, we studied both readmissions and deaths, separately. Second,  
34  
35 it was a prospective study with a long follow-up time of 6 months and no loss to follow-up during  
36  
37 this whole period. Third, we included only unplanned readmissions. Fourth, we had no lost to  
38  
39 follow-up, very few missing data, and in the sensitivity analyses including patients with missing  
40  
41 data, excluding patients unable to perform the test, or using other cutoff points to define functional  
42  
43 impairment, results remained unchanged.  
44

45  
46 In conclusion, in this prospective cohort study, functional impairment was associated with an  
47  
48 increased risk of death within 6 months after hospital discharge, but not with a significant risk of  
49  
50 readmission. Simple performance-based assessment may represent a better prognostic measure for  
51  
52 mortality than for readmission.  
53  
54  
55  
56  
57  
58  
59  
60

**REFERENCES**

1. Donzé J, Aujesky D, Williams D, Schnipper JL. Potentially avoidable 30-day hospital readmissions in medical patients: derivation and validation of a prediction model. *JAMA internal medicine* 2013;173:632-8.
2. Donzé J, Lipsitz S, Bates DW, Schnipper JL. Causes and patterns of readmissions in patients with common comorbidities: retrospective cohort study. *BMJ (Clinical research ed)* 2013;347:f7171.
3. Jencks SF, Williams MV, Coleman EA. Rehospitalizations among patients in the Medicare fee-for-service program. *The New England journal of medicine* 2009;360:1418-28.
4. Librero J, Peiro S, Ordinana R. Chronic comorbidity and outcomes of hospital care: length of stay, mortality, and readmission at 30 and 365 days. *Journal of clinical epidemiology* 1999;52:171-9.
5. Kansagara D, Englander H, Salanitro A, et al. Risk Prediction Models for Hospital Readmission: A Systematic Review. *JAMA* 2011;306(15):1688-1698.
6. Roedl KJ, Wilson LS, Fine J. A systematic review and comparison of functional assessments of community-dwelling elderly patients. *Journal of the American Association of Nurse Practitioners* 2016;28:160-9.
7. Beauchet O, Fantino B, Allali G, Muir SW, Montero-Odasso M, Annweiler C. Timed Up and Go test and risk of falls in older adults: a systematic review. *The journal of nutrition, health & aging* 2011;15:933-8.
8. Burke RE, Whitfield EA, Hittle D, et al. Hospital Readmission From Post-Acute Care Facilities: Risk Factors, Timing, and Outcomes. *Journal of the American Medical Directors Association* 2016;17:249-55.
9. Tonkikh O, Shadmi E, Flaks-Manov N, Hoshen M, Balicer RD, Zisberg A. Functional status before and during acute hospitalization and readmission risk identification. *Journal of hospital medicine* 2016;11:636-41.

10. Peel NM, Navanathan S, Hubbard RE. Gait speed as a predictor of outcomes in post-acute transitional care for older people. *Geriatrics & gerontology international* 2014;14:906-10.
11. Robinson TN, Wu DS, Pointer L, Dunn CL, Cleveland JC, Jr., Moss M. Simple frailty score predicts postoperative complications across surgical specialties. *American journal of surgery* 2013;206:544-50.
12. Wong RY, Miller WC. Adverse outcomes following hospitalization in acutely ill older patients. *BMC geriatrics* 2008;8:10.
13. Kon SS, Jones SE, Schofield SJ, et al. Gait speed and readmission following hospitalisation for acute exacerbations of COPD: a prospective study. *Thorax* 2015;70:1131-7.
14. Belga S, Majumdar SR, Kahlon S, et al. Comparing three different measures of frailty in medical inpatients: Multicenter prospective cohort study examining 30-day risk of readmission or death. *Journal of hospital medicine* 2016;11:556-62.
15. Walker KJ, Bailey M, Bradshaw SJ, et al. Timed Up and Go test is not useful as a discharge risk screening tool. *Emergency medicine Australasia : EMA* 2006;18:31-6.
16. Dodson JA, Arnold SV, Gosch KL, et al. Slow Gait Speed and Risk of Mortality or Hospital Readmission After Myocardial Infarction in the Translational Research Investigating Underlying Disparities in Recovery from Acute Myocardial Infarction: Patients' Health Status Registry. *Journal of the American Geriatrics Society* 2016;64:596-601.
17. Roshanravan B, Robinson-Cohen C, Patel KV, et al. Association between physical performance and all-cause mortality in CKD. *Journal of the American Society of Nephrology : JASN* 2013;24:822-30.
18. Tice JA, Kanaya A, Hue T, et al. Risk factors for mortality in middle-aged women. *Archives of internal medicine* 2006;166:2469-77.
19. Bergland A, Jorgensen L, Emaus N, Strand BH. Mobility as a predictor of all-cause mortality in older men and women: 11.8 year follow-up in the Tromso study. *BMC health services research* 2017;17:22.



- 1  
2  
3  
4  
5  
6  
7  
8  
9  
10  
11  
12  
13  
14  
15  
16  
17  
18  
19  
20  
21  
22  
23  
24  
25  
26  
27  
28  
29  
30  
31  
32  
33  
34  
35  
36  
37  
38  
39  
40  
41  
42  
43  
44  
45  
46  
47  
48  
49  
50  
51  
52  
53  
54  
55  
56  
57  
58  
59  
60
20. Antonini TC, de Paz JA, Ribeiro EE, et al. Impact of functional determinants on 5.5-year mortality in Amazon riparian elderly. *Revista panamericana de salud publica = Pan American journal of public health* 2016;40:9-15.
  21. De Buyser SL, Petrovic M, Taes YE, Toye KR, Kaufman JM, Goemaere S. Physical function measurements predict mortality in ambulatory older men. *European journal of clinical investigation* 2013;43:379-86.
  22. Idland G, Engedal K, Bergland A. Physical performance and 13.5-year mortality in elderly women. *Scandinavian journal of public health* 2013;41:102-8.
  23. Studenski S, Perera S, Patel K, et al. Gait speed and survival in older adults. *Jama* 2011;305:50-8.
  24. Castro-Rodriguez M, Carnicero JA, Garcia-Garcia FJ, et al. Frailty as a Major Factor in the Increased Risk of Death and Disability in Older People With Diabetes. *Journal of the American Medical Directors Association* 2016;17:949-55.
  25. Castro-Rodriguez M, Carnicero JA, Garcia-Garcia FJ, et al. Frailty as a Major Factor in the Increased Risk of Death and Disability in Older People With Diabetes. *Journal of the American Medical Directors Association* 2016.
  26. Nikolaus T, Bach M, Oster P, Schlierf G. Prospective value of self-report and performance-based tests of functional status for 18-month outcomes in elderly patients. *Aging (Milan, Italy)* 1996;8:271-6.
  27. Hoeymans N, Wouters ER, Feskens EJ, van den Bos GA, Kromhout D. Reproducibility of performance-based and self-reported measures of functional status. *The journals of gerontology Series A, Biological sciences and medical sciences* 1997;52:M363-8.
  28. Podsiadlo D, Richardson S. The timed "Up & Go": a test of basic functional mobility for frail elderly persons. *Journal of the American Geriatrics Society* 1991;39:142-8.
  29. Herman T, Giladi N, Hausdorff JM. Properties of the 'timed up and go' test: more than meets the eye. *Gerontology* 2011;57:203-10.

- 1  
2  
3  
4  
5  
6  
7  
8  
9  
10  
11  
12  
13  
14  
15  
16  
17  
18  
19  
20  
21  
22  
23  
24  
25  
26  
27  
28  
29  
30  
31  
32  
33  
34  
35  
36  
37  
38  
39  
40  
41  
42  
43  
44  
45  
46  
47  
48  
49  
50  
51  
52  
53  
54  
55  
56  
57  
58  
59  
60
30. von Elm E, Altman DG, Egger M, Pocock SJ, Gøtzsche PC, Vandenbroucke JP. The Strengthening of Reporting of Observational Studies in Epidemiology (STROBE) Statement: guidelines for reporting observational studies. *International journal of surgery (London, England)* 2014;12:1495-9.
31. Zweig MH, Campbell G. Receiver-operating characteristic (ROC) plots: a fundamental evaluation tool in clinical medicine. *Clinical chemistry* 1993;39:561-77.
32. Charlson ME, Pompei P, Ales KL, MacKenzie CR. A new method of classifying prognostic comorbidity in longitudinal studies: development and validation. *Journal of chronic diseases* 1987;40:373-83.
33. Belsley DA, E. Kuh, and R. E. Welsch. 1980. *Regression Diagnostics: Identifying Influential Data and Sources of Collinearity*. New York: Wiley.
34. Pregibon D. University of Toronto. 1980. Goodness of link tests for generalized linear models. *Applied Statistics* 29: 15-24.
35. Steyerberg EW, Vickers AJ, Cook NR, et al. Assessing the performance of prediction models: a framework for traditional and novel measures. *Epidemiology (Cambridge, Mass)* 2010;21:128-38.
36. Sebastiao E, Sandroff BM, Learmonth YC, Motl RW. Validity of the Timed Up and Go Test as a Measure of Functional Mobility in Persons With Multiple Sclerosis. *Archives of physical medicine and rehabilitation* 2016;97:1072-7.
37. Gautschi OP, Smoll NR, Corniola MV, et al. Validity and Reliability of a Measurement of Objective Functional Impairment in Lumbar Degenerative Disc Disease: The Timed Up and Go (TUG) Test. *Neurosurgery* 2016;79:270-8.
38. Berg KO, Maki BE, Williams JI, Holliday PJ, Wood-Dauphinee SL. Clinical and laboratory measures of postural balance in an elderly population. *Archives of physical medicine and rehabilitation* 1992;73:1073-80.
39. Isles RC, Choy NL, Steer M, Nitz JC. Normal values of balance tests in women aged 20-80. *Journal of the American Geriatrics Society* 2004;52:1367-72.

- 1  
2  
3  
4  
5  
6  
7  
8  
9  
10  
11  
12  
13  
14  
15  
16  
17  
18  
19  
20  
21  
22  
23  
24  
25  
26  
27  
28  
29  
30  
31  
32  
33  
34  
35  
36  
37  
38  
39  
40  
41  
42  
43  
44  
45  
46  
47  
48  
49  
50  
51  
52  
53  
54  
55  
56  
57  
58  
59  
60
40. Shumway-Cook A, Brauer S, Woollacott M. Predicting the probability for falls in community-dwelling older adults using the Timed Up & Go Test. *Physical therapy* 2000;80:896-903.
  41. Steffen TM, Hacker TA, Mollinger L. Age- and gender-related test performance in community-dwelling elderly people: Six-Minute Walk Test, Berg Balance Scale, Timed Up & Go Test, and gait speeds. *Physical therapy* 2002;82:128-37.
  42. Janssen WG, Bussmann HB, Stam HJ. Determinants of the sit-to-stand movement: a review. *Physical therapy* 2002;82:866-79.
  43. Vereeck L, Wuyts F, Truijen S, Van de Heyning P. Clinical assessment of balance: normative data, and gender and age effects. *International journal of audiology* 2008;47:67-75.
  44. Boulgarides LK, McGinty SM, Willett JA, Barnes CW. Use of clinical and impairment-based tests to predict falls by community-dwelling older adults. *Physical therapy* 2003;83:328-39.
  45. Garland SJ, Stevenson TJ, Ivanova T. Postural responses to unilateral arm perturbation in young, elderly, and hemiplegic subjects. *Archives of physical medicine and rehabilitation* 1997;78:1072-7.
  46. Mueller K, Hamilton G, Rodden B, DeHeer HD. Functional Assessment and Intervention by Nursing Assistants in Hospice and Palliative Care Inpatient Care Settings: A Quality Improvement Pilot Study. *The American journal of hospice & palliative care* 2016;33:136-43.
  47. Murphy K, Lowe S. Improving fall risk assessment in home care: interdisciplinary use of the Timed Up and Go (TUG). *Home healthcare nurse* 2013;31:389-96; quiz 96-8.
  48. Gu MO, Conn VS. Meta-analysis of the effects of exercise interventions on functional status in older adults. *Research in nursing & health* 2008;31:594-603.

**Table 1.** Baseline characteristics according to the presence of 6-month readmission.

| Variable                               | 6-month<br>readmission (n=107) | No 6-month<br>readmission (n=231) |
|----------------------------------------|--------------------------------|-----------------------------------|
| Age, years                             | 72 (64-83)                     | 74 (64-83)                        |
| Men                                    | 57 (53.3)                      | 111 (48.1)                        |
| Charlson comorbidity index             | 8 (6-10)                       | 6 (4-8)                           |
| Multimorbidity *                       | 100 (93.5)                     | 202 (87.5)                        |
| Previous admission †                   | 51 (47.7)                      | 44 (19.1)                         |
| Duration of TUG test, seconds          | 13 (10-19)                     | 12 (8-18)                         |
| TUG test duration $\geq$ 15 seconds    | 46 (43.0)                      | 83 (35.9)                         |
| <b>Hospitalization characteristics</b> |                                |                                   |
| Elective                               | 3 (2.8)                        | 10 (4.3)                          |
| Length of stay, days                   | 9 (5-15)                       | 6 (4-11)                          |
| <b>Diagnosis of index admission</b>    |                                |                                   |
| Cardiovascular disease ‡               | 25 (23.4)                      | 66 (28.6)                         |
| Infection                              | 20 (18.7)                      | 47 (20.4)                         |
| Neuropsychiatric disease §,            | 17 (15.9)                      | 48 (20.8)                         |
| Oncological disease                    | 16 (15.0)                      | 10 (4.3)                          |
| Respiratory disease §                  | 15 (14.0)                      | 15 (6.5)                          |
| Other                                  | 4 (3.8)                        | 12 (5.2)                          |
| Gastrointestinal disease §             | 2 (1.9)                        | 16 (6.9)                          |
| Osteoarticular disease §               | 4 (3.8)                        | 6 (2.6)                           |
| Endocrine or metabolic disease         | 3 (2.8)                        | 8 (3.5)                           |
| Renal disease ‡                        | 1 (0.9)                        | 3 (1.3)                           |

Data are n (% of column) or median (interquartile range).

\* Two or more comorbidities as recorded in the Charlson comorbidity index.

† Hospital admission(s) during the 6 months preceding index admission.

‡ Including ischemic/thrombotic disorder, congestive heart failure, arrhythmia.

§ Other than infection.

|| Including dementia, alcohol disorder, intoxication.

**Table 2.** Baseline characteristics according to the presence of 6-month death.

| Variable                               | 6-month death<br>(n=31) | No 6-month death<br>(n=331) |
|----------------------------------------|-------------------------|-----------------------------|
| Age, years                             | 69 (64-80)              | 74 (65-83)                  |
| Men                                    | 15 (48.4)               | 153 (49.8)                  |
| Charlson comorbidity index             | 10 (7-12)               | 7 (5-9)                     |
| Multimorbidity *                       | 28 (90.3)               | 274 (89.3)                  |
| Previous admission †                   | 17 (54.8)               | 78 (25.4)                   |
| Duration of TUG test, seconds          | 17 (11-21)              | 12 (8-18)                   |
| TUG test duration $\geq$ 15 seconds    | 18 (58.0)               | 111 (36.2)                  |
| <b>Hospitalization characteristics</b> |                         |                             |
| Elective                               | 0 (0.0)                 | 13 (4.2)                    |
| Length of stay, days                   | 13 (6-27)               | 6 (4-11)                    |
| <b>Diagnosis of index admission</b>    |                         |                             |
| Cardiovascular disease ‡               | 3 (9.7)                 | 88 (28.7)                   |
| Infection                              | 5 (16.1)                | 62 (20.2)                   |
| Neuropsychiatric disease §,            | 2 (6.5)                 | 63 (0.5)                    |
| Oncological disease                    | 12 (38.7)               | 14 (4.6)                    |
| Respiratory disease §                  | 1 (3.2)                 | 29 (9.5)                    |
| Other                                  | 2 (6.5)                 | 14 (4.6)                    |
| Gastrointestinal disease §             | 4 (12.9)                | 14 (4.6)                    |
| Osteoarticular disease §               | 0 (0.0)                 | 10 (3.3)                    |
| Endocrine or metabolic disease         | 1 (3.2)                 | 10 (3.3)                    |
| Renal disease ‡                        | 1 (3.2)                 | 3 (1.0)                     |

Data are n (% of column) or median (interquartile range).

\* Two or more comorbidities as recorded in the Charlson comorbidity index.

† Hospital admission(s) during the 6 months preceding index admission.

‡ Including ischemic/thrombotic disorder, congestive heart failure, arrhythmia.

§ Other than infection.

|| Including dementia, alcohol disorder, intoxication.

**FIGURE CAPTION**

**Figure 1.** Study flow diagram.

For peer review only

1  
2  
3  
4  
5  
6  
7  
8  
9  
10  
11  
12  
13  
14  
15  
16  
17  
18  
19  
20  
21  
22  
23  
24  
25  
26  
27  
28  
29  
30  
31  
32  
33  
34  
35  
36  
37  
38  
39  
40  
41  
42  
43  
44  
45  
46  
47  
48  
49  
50  
51  
52  
53  
54  
55  
56  
57  
58  
59  
60

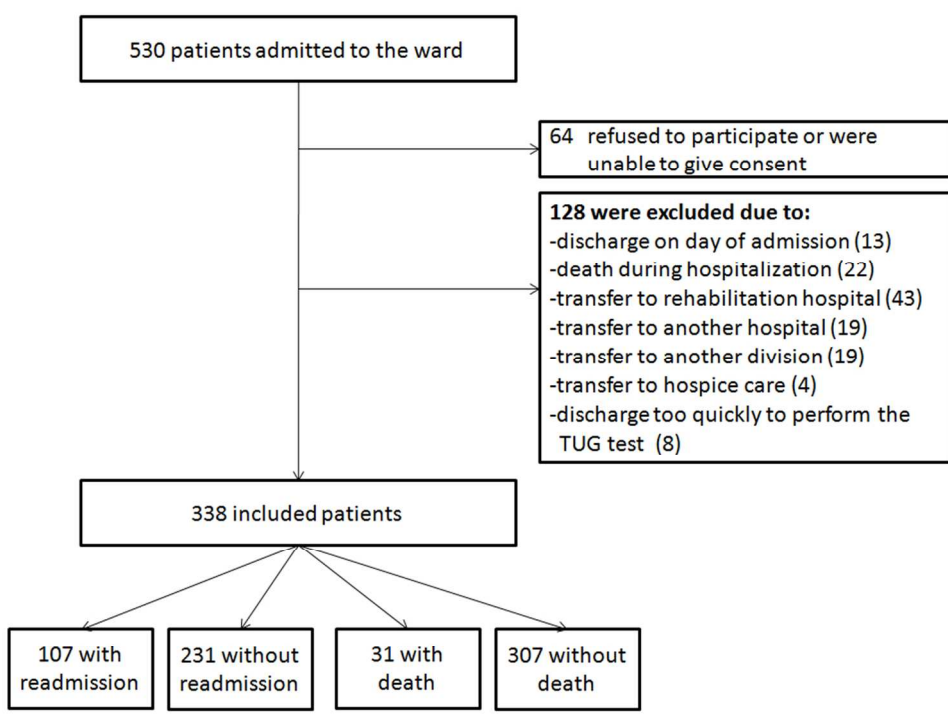

Figure 1. Study flow diagram.

85x65mm (300 x 300 DPI)

STROBE Statement—Checklist of items that should be included in reports of *cohort studies*

|                           | Item No | Recommendation                                                                                                                                                                                               |                |
|---------------------------|---------|--------------------------------------------------------------------------------------------------------------------------------------------------------------------------------------------------------------|----------------|
| <b>Title and abstract</b> | 1       | (a) Indicate the study's design with a commonly used term in the title or the abstract                                                                                                                       | 1              |
|                           |         | (b) Provide in the abstract an informative and balanced summary of what was done and what was found                                                                                                          | 2              |
| <b>Introduction</b>       |         |                                                                                                                                                                                                              |                |
| Background/rationale      | 2       | Explain the scientific background and rationale for the investigation being reported                                                                                                                         | 4              |
| Objectives                | 3       | State specific objectives, including any prespecified hypotheses                                                                                                                                             | 4-5            |
| <b>Methods</b>            |         |                                                                                                                                                                                                              |                |
| Study design              | 4       | Present key elements of study design early in the paper                                                                                                                                                      | 6              |
| Setting                   | 5       | Describe the setting, locations, and relevant dates, including periods of recruitment, exposure, follow-up, and data collection                                                                              | 6              |
| Participants              | 6       | (a) Give the eligibility criteria, and the sources and methods of selection of participants. Describe methods of follow-up                                                                                   | 6              |
|                           |         | (b) For matched studies, give matching criteria and number of exposed and unexposed                                                                                                                          | NA             |
| Variables                 | 7       | Clearly define all outcomes, exposures, predictors, potential confounders, and effect modifiers. Give diagnostic criteria, if applicable                                                                     | 6-8            |
| Data sources/measurement  | 8*      | For each variable of interest, give sources of data and details of methods of assessment (measurement). Describe comparability of assessment methods if there is more than one group                         | 6-8            |
| Bias                      | 9       | Describe any efforts to address potential sources of bias                                                                                                                                                    | 8-9            |
| Study size                | 10      | Explain how the study size was arrived at                                                                                                                                                                    | 6              |
| Quantitative variables    | 11      | Explain how quantitative variables were handled in the analyses. If applicable, describe which groupings were chosen and why                                                                                 | 7              |
| Statistical methods       | 12      | (a) Describe all statistical methods, including those used to control for confounding                                                                                                                        | } 8-9          |
|                           |         | (b) Describe any methods used to examine subgroups and interactions                                                                                                                                          |                |
|                           |         | (c) Explain how missing data were addressed                                                                                                                                                                  |                |
|                           |         | (d) If applicable, explain how loss to follow-up was addressed                                                                                                                                               |                |
|                           |         | (e) Describe any sensitivity analyses                                                                                                                                                                        |                |
| <b>Results</b>            |         |                                                                                                                                                                                                              |                |
| Participants              | 13*     | (a) Report numbers of individuals at each stage of study—eg numbers potentially eligible, examined for eligibility, confirmed eligible, included in the study, completing follow-up, and analysed            | 10+Fig. 1      |
|                           |         | (b) Give reasons for non-participation at each stage                                                                                                                                                         | 6+Fig. 1       |
|                           |         | (c) Consider use of a flow diagram                                                                                                                                                                           | Fig. 1         |
| Descriptive data          | 14*     | (a) Give characteristics of study participants (eg demographic, clinical, social) and information on exposures and potential confounders                                                                     | 10+ Tables 1&2 |
|                           |         | (b) Indicate number of participants with missing data for each variable of interest                                                                                                                          | Fig. 1         |
|                           |         | (c) Summarise follow-up time (eg, average and total amount)                                                                                                                                                  | 10             |
| Outcome data              | 15*     | Report numbers of outcome events or summary measures over time                                                                                                                                               | 10             |
| Main results              | 16      | (a) Give unadjusted estimates and, if applicable, confounder-adjusted estimates and their precision (eg, 95% confidence interval). Make clear which confounders were adjusted for and why they were included | 10-11          |
|                           |         | (b) Report category boundaries when continuous variables were categorized                                                                                                                                    | 10-11          |
|                           |         | (c) If relevant, consider translating estimates of relative risk into absolute risk for a meaningful time period                                                                                             | NA             |



|                          |    |                                                                                                                                                                            |       |
|--------------------------|----|----------------------------------------------------------------------------------------------------------------------------------------------------------------------------|-------|
| Other analyses           | 17 | Report other analyses done—eg analyses of subgroups and interactions, and sensitivity analyses                                                                             | 11    |
| <b>Discussion</b>        |    |                                                                                                                                                                            |       |
| Key results              | 18 | Summarise key results with reference to study objectives                                                                                                                   | 12-14 |
| Limitations              | 19 | Discuss limitations of the study, taking into account sources of potential bias or imprecision. Discuss both direction and magnitude of any potential bias                 | 3-14  |
| Interpretation           | 20 | Give a cautious overall interpretation of results considering objectives, limitations, multiplicity of analyses, results from similar studies, and other relevant evidence | 12-14 |
| Generalisability         | 21 | Discuss the generalisability (external validity) of the study results                                                                                                      | 12-14 |
| <b>Other information</b> |    |                                                                                                                                                                            |       |
| Funding                  | 22 | Give the source of funding and the role of the funders for the present study and, if applicable, for the original study on which the present article is based              | 1     |

\*Give information separately for exposed and unexposed groups.

**Note:** An Explanation and Elaboration article discusses each checklist item and gives methodological background and published examples of transparent reporting. The STROBE checklist is best used in conjunction with this article (freely available on the Web sites of PLoS Medicine at <http://www.plosmedicine.org/>, Annals of Internal Medicine at <http://www.annals.org/>, and Epidemiology at <http://www.epidem.com/>). Information on the STROBE Initiative is available at <http://www.strobe-statement.org>.
